# Supplementary material for: Replication termination and chromosome dimer resolution in the archaeon Sulfolobus solfataricus
Source: PubMed Central journal article supplement — EMBO J. 2010 Nov 26;30(1):145–53. doi: 10.1038/emboj.2010.301 (PMC3020120; doi:10.1038/emboj.2010.301), 2010-11-26
Supplement: emboj2010301s1.pdf [file emboj2010301s1.pdf]

**Table S1.** Genomic fragments and probes used for the data in Fig. 1.

| <b>Panel</b> | <b>Fragment coordinates<sup>a</sup> (and enzyme used)</b> | <b>Probe coordinates<sup>a</sup> (and name<sup>b</sup>)</b> |
|--------------|-----------------------------------------------------------|-------------------------------------------------------------|
| B-a          | 453053-460881 (Xmnl)                                      | 459927-460422 (460)                                         |
| B-b          | 457492-461536 (Pvull)                                     | 459927-460422 (460)                                         |
| B-c          | 459830-466464 (AflIII)                                    | 462379-462887 (463)                                         |
| B-d          | 465471-471399 (Xmnl)                                      | 469111-469545 (469)                                         |
| B-e          | 468606-472819 (Nsil)                                      | 469111-469545 (469)                                         |
| B-f          | 471702-479483 (NheI)                                      | 478171-478700 (478)                                         |
| B-g          | 478083-485927 (Nsil)                                      | 478171-478700 (478)                                         |
| B-h          | 484422-491388 (HindIII)                                   | 490172-490836 (491)                                         |
| B-i          | 489904-497758 (XcmI)                                      | 490172-490836 (491)                                         |
| B-j          | 496443-503659 (Xmnl)                                      | 501924-502331 (502)                                         |
| B-k          | 500927-508444 (NdeI)                                      | 501924-502331 (502)                                         |
| B-l          | 504093-510630 (HindIII)                                   | 510140-510594 (510)                                         |
| B-m          | 510451-516935 (AflIII)                                    | 515023-515440 (515)                                         |
| B-n          | 515738-524102 (Avall)                                     | 522970-523387 (523)                                         |
| B-o          | 521377-529103 (NdeI)                                      | 522970-523387 (523)                                         |
| B-p          | 528156-537640 (Nsil)                                      | 529876-530396 (530)                                         |
| B-q          | 535642-542401 (Accl)                                      | 541998-542468 (542)                                         |
| B-r          | 540496-547485 (Avall)                                     | 541998-542468 (542)                                         |
| B-s          | 545387-550078 (HindIII)                                   | 549021-549607 (549)                                         |
| B-t          | 548788-560137 (AflIII)                                    | 549021-549607 (549)                                         |
| B-u          | 552983-561514 (BglIII)                                    | 560209-560701 (560)                                         |
| B-v          | 560137-115007 (AflIII)                                    | 560209-560701 (560)                                         |
| B-w          | 563283-567652 (Avall)                                     | 566915-567458 (567)                                         |
| B-x          | 566552-574236 (Pvull)                                     | 566915-567458 (567)                                         |
| B-y          | 575726-580820 (Accl)                                      | 576206-576674 (576)                                         |
| C-a          | 1345242-1352122 (HindIII)                                 | 1347147-1347671 (1347)                                      |
| C-b          | 1348942-1356649 (Xmnl)                                    | 1352885-1353521 (1353)                                      |
| C-c          | 1354942-1360729 (PstI)                                    | 1355832-1356608 (1356)                                      |
| C-d          | 1354906-1363717 (NcoI)                                    | 1355832-1356608 (1356)                                      |
| C-e          | 1356288-1361481 (Accl)                                    | 1357634-1358044 (1358)                                      |
| C-f          | 1361134-1366328 (NdeI)                                    | 1365171-1365713 (1365)                                      |
| C-g          | 1363508-1368545 (HindIII)                                 | 1365171-1365713 (1365)                                      |
| C-h          | 1367010-1373149 (NdeI)                                    | 1372096-1372606 (1372)                                      |
| C-i          | 1371671-1375745 (Accl)                                    | 1372096-1372606 (1372)                                      |
| C-j          | 1374710-1379882 (HindIII)                                 | 1375947-1376427 (1376)                                      |
| C-k          | 1378005-1385788 (Pvull)                                   | 1385171-1385755 (1385)                                      |
| C-l          | 1382653-1389706 (HindIII)                                 | 1385171-1385755 (1385)                                      |
| C-m          | 1388173-1394122 (NdeI)                                    | 1393333-1393742 (1393)                                      |
| C-n          | 1391606-1397850 (Xmnl)                                    | 1393333-1393742 (1393)                                      |
| C-o          | 1395277-1401341 (BglIII)                                  | 1400793-1401343 (1401)                                      |
| C-p          | 1399100-1405342 (Pvull)                                   | 1400793-1401343 (1401)                                      |
| C-q          | 1403589-1408763 (Xmnl)                                    | 1407835-1408240 (1408)                                      |
| C-r          | 1407046-1416496 (Nsil)                                    | 1407835-1408240 (1408)                                      |
| C-s          | 1413999-1419495 (Xmnl)                                    | 1418177-1418628 (1418)                                      |

Table S1 continued

| Panel | Fragment coordinates <sup>a</sup> (and enzyme used) | Probe coordinates <sup>a</sup> (and name <sup>b</sup> ) |
|-------|-----------------------------------------------------|---------------------------------------------------------|
| C-t   | 1418118-1424400 (XcmI)                              | 1418177-1418628 (1418)                                  |
| C-u   | 1424001-1429721 (XmnI)                              | 1428924-1429391 (1429)                                  |
| C-v   | 1427477-1432713 (AflII)                             | 1428924-1429391 (1429)                                  |
| C-w   | 1431025-1436248 (HindIII)                           | 1435764-1436177 (1436)                                  |
| C-x   | 1435723-1441754 (BglII)                             | 1435764-1436177 (1436)                                  |
| D-a   | 2560951-2565626 (NdeI)                              | 2565210-2565614 (2565)                                  |
| D-b   | 2563953-2567740 (AflII)                             | 2565210-2565614 (2565)                                  |
| D-c   | 2565189-2571376 (BamHI)                             | 2565210-2565614 (2565)                                  |
| D-d   | 2568956-2575384 (NheI)                              | 2574388-2574806 (2575)                                  |
| D-e   | 2573892-2578582 (EcoRV)                             | 2574388-2574806 (2575)                                  |
| D-f   | 2577110-2579961 (AclI)                              | 2579201-2579623 (2579)                                  |
| D-g   | 2574873-2583535 (XmnI)                              | 2579201-2579623 (2579)                                  |
| D-h   | 2581016-2587540 (PstI)                              | 2586957-2587368 (2587)                                  |
| D-i   | 2586827-2589742 (XmnI)                              | 2586957-2587368 (2587)                                  |
| D-j   | 2588677-2593947 (NdeI)                              | 2593152-2593629 (2593)                                  |
| D-k   | 2592168-2598198 (EcoRV)                             | 2593152-2593629 (2593)                                  |
| D-l   | 2596703-2601873 (XmnI)                              | 2601124-2601582 (2601)                                  |
| D-m   | 2600953-2606569 (NdeI)                              | 2601124-2601582 (2601)                                  |
| D-n   | 2605048-2609798 (XmnI)                              | 2608795-2609229 (2609)                                  |
| D-o   | 2608693-2615463 (AclI)                              | 2608795-2609229 (2609)                                  |
| D-p   | 2613935-2620904 (NheI)                              | 2620349-2620846 (2621)                                  |
| D-q   | 2619383-2625012 (HindIII)                           | 2620349-2620846 (2621)                                  |
| D-r   | 2623961-2629923 (AvaII)                             | 2628313-2628783 (2629)                                  |
| D-s   | 2628210-2635892 (NcoI)                              | 2628313-2628783 (2629)                                  |
| D-t   | 2634619-2640453 (BamHI)                             | 2639369-2639867 (2640)                                  |
| D-u   | 2639265-2643734 (AflII)                             | 2639369-2639867 (2640)                                  |
| D-v   | 2641968-2650017 (NcoI)                              | 2648361-2648822 (2649)                                  |
| D-w   | 2646742-2652078 (AvaII)                             | 2648361-2648822 (2649)                                  |
| D-x   | 2649818-2656723 (NheI)                              | 2656043-2656494 (2656)                                  |
| D-y   | 2655776-2659846 (AclI)                              | 2656043-2656494 (2656)                                  |

<sup>a</sup> Coordinates relate to the genome sequence: She Q, Singh RK, Confalonieri F, Zivanovic Y, Allard G, Awayez MJ, Chan-Weiher CCY, Clausen IG, Curtis BA, De Moors A et al (2001) The complete genome of the crenarchaeon *Sulfolobus solfataricus* P2. *Proc Natl Acad Sci USA* **98**: 7835-7840.  
<http://www-archbac.u-psud.fr/projects/sulfolobus/>

<sup>b</sup> Probes were generated using PCR and named relative to their nearest genomic location (kb).

# A PBL2025

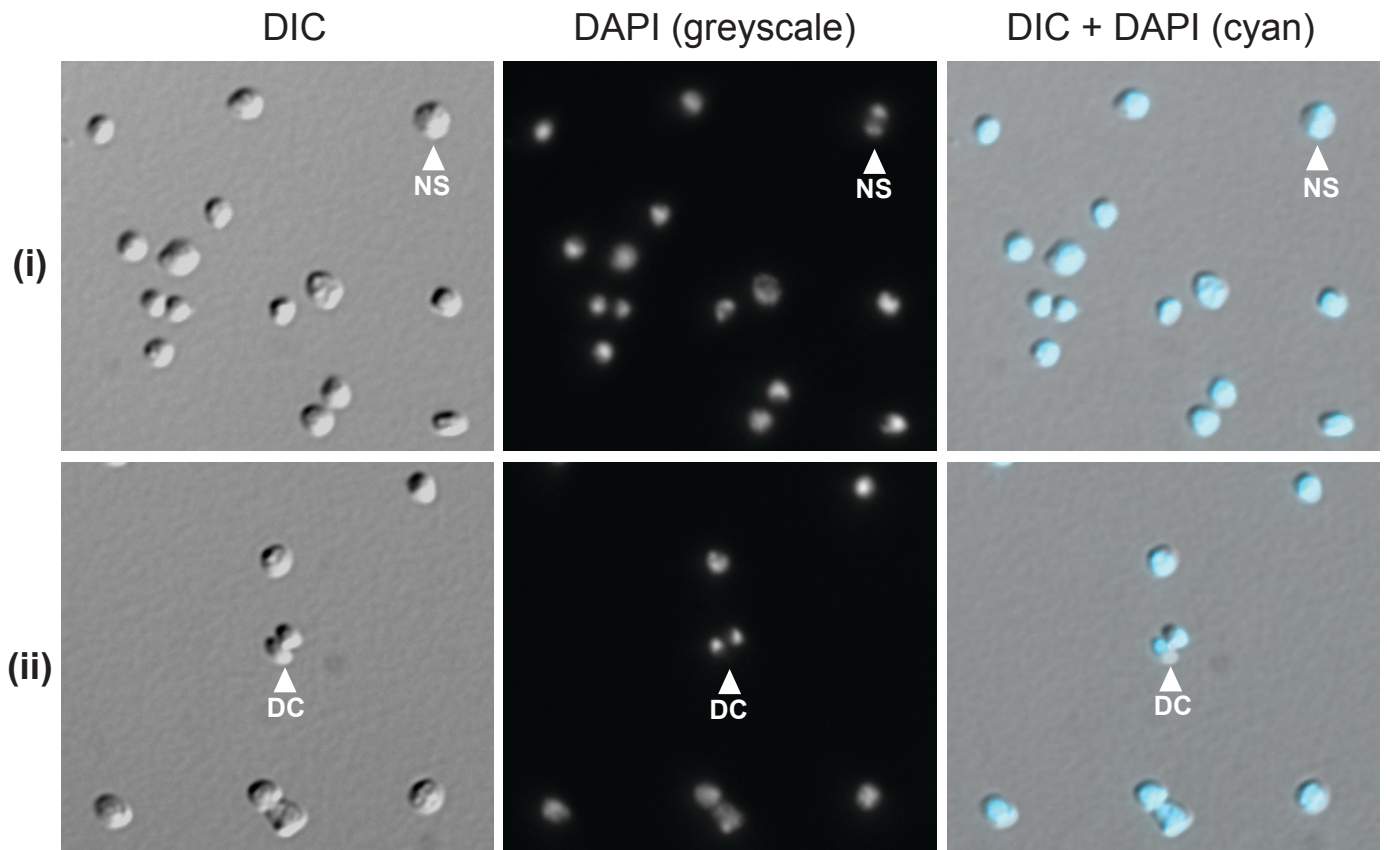

# B $\Delta xer::lacS$

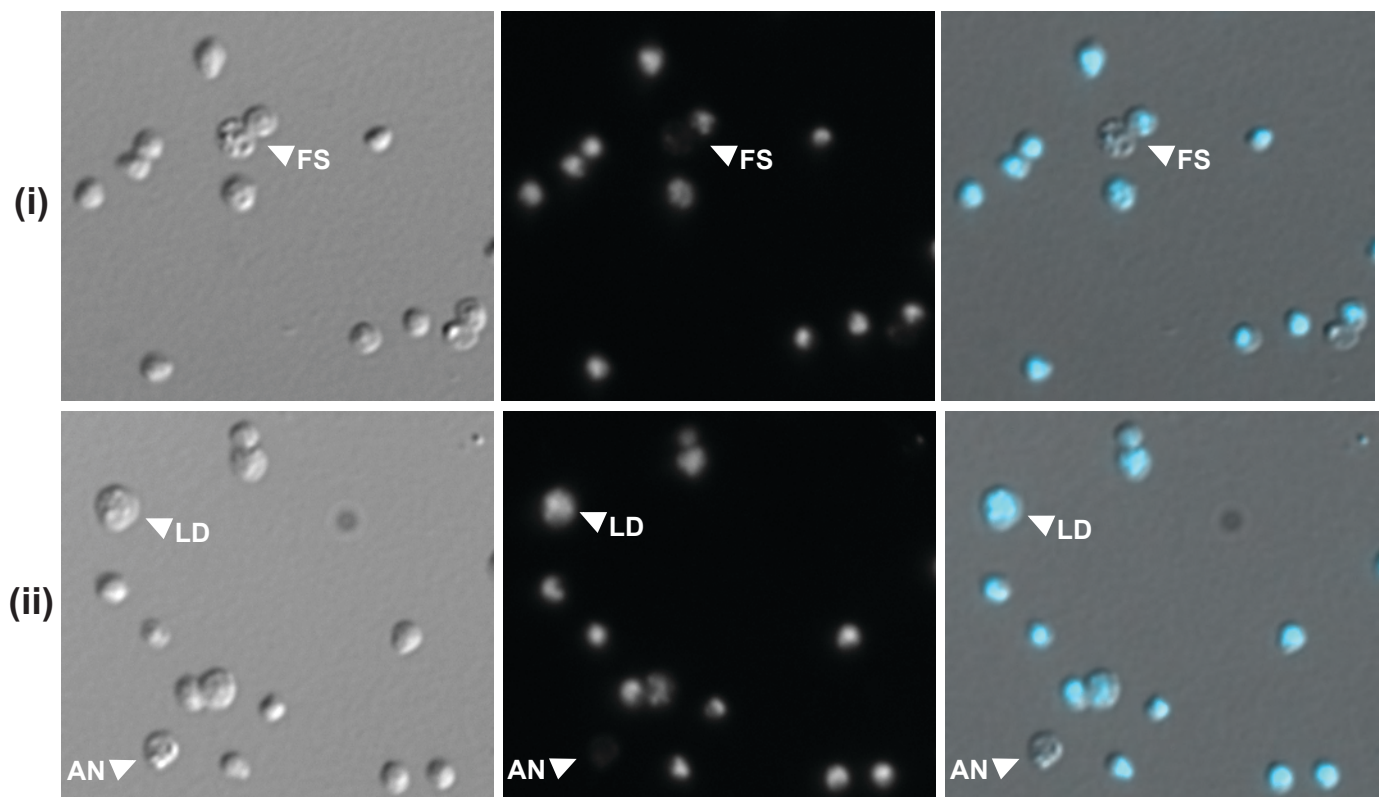

**Fig. S2.** Microscopy of *S. solfataricus* PBL2025 (A) and  $\Delta xer::lacS$  (B). Cells were sampled at the same time as those for flow cytometry in Fig. 2D and were prepared with the same method except the final resuspension contained 1  $\mu\text{g/ml}$  DAPI instead of Sytox Green/RNase. Cells were applied to agarose pads for microscopy. Representative panels of both Differential Interference Contrast (DIC) and fluorescence (DAPI) micrographs acquired for each field are shown. The right-hand panels show an overlay of the two images, with DAPI coloured cyan. Examples of the types of cells observed are indicated by arrow-heads; abbreviations correspond to those specified in the abundance analysis in Fig. 2F (NS - Nucleoid segregation, DC - Doublet or dividing cell, FS - Failed segregation, LD - Large diffuse nucleoid, AN - Anucleate).
